# Supplementary material for: Customizing the water-scarce, zinc ion-rich Helmholtz plane of a zinc anode for Ah-scale Zn metal batteries
Source: Royal Society of Chemistry journal article supplement (doi:10.1039/d4ee02909g), 2024-01-01
Supplement: d4ee02909g1.pdf [file d4ee02909g1.pdf]

## Supporting Information

### Customizing water-scarce, zinc ion-rich Helmholtz plane of zinc anode for Ah-scale Zn metal batteries

Guowei Gao,<sup>a</sup> Xiaomei Huo,<sup>a</sup> Boxin Li,<sup>a</sup> Jingxuan Bi,<sup>a</sup> Zhenkai Zhou,<sup>a</sup> Zhuzhu Du,<sup>b</sup>  
Wei Ai\*<sup>a</sup> and Wei Huang\*<sup>a</sup>

<sup>a</sup> Frontiers Science Center for Flexible Electronics and Xi'an Institute of Flexible Electronics, Northwestern Polytechnical University, Xi'an 710072, China. \*E-mail: iamwai@nwpu.edu.cn, vc@nwpu.edu.cn

<sup>b</sup> School of Materials Science and Engineering & Institute of Flexible Electronics and Intelligent Textile, Xi'an Polytechnic University, Xi'an 710048, China

## Experimental Section

**Preparation of Zn@IL and Zn@IL&PPS:** Zn@IL was synthesized by immersing Zn foil (100  $\mu\text{m}$ ) in a mixture of IL (99%) and deionized water. The foil was left in the solution for varying durations, then removed and heat-treated in a vacuum oven at 60  $^{\circ}\text{C}$  to evaporate the residual water. The synthesis procedure for Zn@IL&PPS followed a similar approach, with the Zn foil being immersed in a mixed solution of IL and PEDOT:PSS (1.5% in water) for different periods. Subsequently, the IL-doped hydrogel-coated Zn foil was dried in a vacuum oven at 60  $^{\circ}\text{C}$  to produce the Zn@IL&PPS.

**Preparation of  $\delta\text{-MnO}_2$  cathode:** 0.403 g of  $\text{MnSO}_4$  and 2.529 g of  $\text{KMnO}_4$  were dissolved in 70 mL of deionized water by stirring. The solution was then transferred into a reaction kettle and reacted at 160  $^{\circ}\text{C}$  for 12 h. The resulting precipitate was collected, thoroughly washed with deionized water and absolute ethanol to remove impurities, and then dried at 60  $^{\circ}\text{C}$  to obtain  $\delta\text{-MnO}_2$ . The slurry, composed of 70 wt%  $\delta\text{-MnO}_2$  powders, 10 wt% polyvinylidene fluoride (PVDF) binder, and 20 wt% acetylene black, was blade-coated onto a carbon paper. It was then dried at 60  $^{\circ}\text{C}$  for 24 h to produce the  $\delta\text{-MnO}_2$  cathodes with a loading of  $\sim 4 \text{ mg cm}^{-2}$ .

**Preparation of  $\text{I}_2$  cathode:** The  $\text{I}_2$  cathodes were prepared through electrodeposition.<sup>1, 2</sup> The working electrode, consisting of activated carbon (YP50F) and PVDF in a 1:1 ratio, was coated onto a stainless steel mesh with 200 mesh count. The typical mass loading of  $\text{I}_2$  is  $34.5 \text{ mg cm}^{-2}$ .

**Materials characterization:** The morphologies and components of the samples were characterized using SEM (FEI Verios G4) with an energy dispersive spectrometry. The phases and structures were examined by XRD using a Bruker D8 instrument with  $\text{Cu K}\alpha$  radiation ( $\lambda = 0.154056 \text{ nm}$ ). FTIR of the samples were recorded with a Bruker Tensor 27. XPS was conducted on a Thermo Scientific K-Alpha instrument (Thermo Fisher Scientific). WAXS was conducted on a Xeuss 3.0 with a  $\text{Cu K}\alpha$  X-ray source. The optical images were taken by an optical microscope (Yueshi YM520R). The RTCs of different Zn lattice planes are calculated using the following formula:<sup>3, 4</sup>

$$RTC_{(hkl)} = \frac{I_{(hkl)}/I_{0(hkl)}}{\sum (I_{(hkl)}/I_{0(hkl)})} * 100$$

where  $I_{(hkl)}$  is the intensity obtained from experimental samples, and  $I_{0(hkl)}$  is the intensity of the standard sample (PDF #04-0831).

**Electrochemical measurements:** For coin cell assembly, the Zn||Zn symmetrical cells, Zn||Cu asymmetric cells, and full cells were assembled using CR2032 coin cells. In symmetrical cell assembly, two Zn foils ( $\phi = 12$  mm) served as both the anode and cathode. In asymmetric cell assembly, a Zn foil ( $\phi = 12$  mm) anode was paired with a Cu foil cathode (10  $\mu$ m, 99.99%,  $\phi = 16$  mm). For full cell assembly, a Zn foil ( $\phi = 12$  mm) anode was paired with a  $\delta$ -MnO<sub>2</sub> cathode ( $\phi = 12$  mm). All cells were assembled in an open-air environment using Whatman GF/D as the separator, and each cell contained approximately 75  $\mu$ L of 2 M ZnSO<sub>4</sub> electrolyte. For pouch cell assembly,  $\delta$ -MnO<sub>2</sub> cathodes measured 5 cm  $\times$  5 cm and I<sub>2</sub> cathodes measured 10 cm  $\times$  10 cm. The electrolyte used was a mixed solution of 1 M ZnSO<sub>4</sub> and 0.1 M KI. Electrochemical tests were conducted on a NEWARE battery-testing system and an Autolab PGSTAT 302N electrochemical workstation. The frequency range for EIS spanned from 1 MHz to 1 Hz, while the voltage range for  $\delta$ -MnO<sub>2</sub> and I<sub>2</sub>-based cells was set at 0.8-1.8 V and 0.6-1.6 V, respectively. The transference numbers for Zn<sup>2+</sup> ( $t_{Zn^{2+}}$ ) in the symmetrical Zn cells were evaluated using EIS before and after the CA test,<sup>5,6</sup> calculated as follows:

$$t_{Zn^{2+}} = \frac{I_s(\Delta V - I_o R_o)}{I_o(\Delta V - I_s R_s)}$$

where  $\Delta V$  represents the applied voltage polarization (25 mV),  $I_s$  and  $R_s$  are the steady state current and resistance, respectively, and  $I_o$  and  $R_o$  are the initial current and resistance, respectively.

**Computational detail:** DFT calculations were performed to investigate adsorption energy between the Zn (002) and various ions using the CASTEP method.<sup>[1]</sup> The calculations employed the Generalized Gradient Approximation with the Perdew-Burke-Ernzerhof formulation, providing an accurate representation of the exchange-correlation energy.<sup>7-10</sup> A cutoff energy of 550 eV was selected for the plane-wave basis,

and ultrasoft pseudopotentials were used. Geometry optimizations were conducted using the Broyden-Fletcher-Goldfarb-Shannon algorithm.<sup>11</sup> The Zn (002) slab, characterized by lattice parameters  $a = b = 14.2339 \text{ \AA}$  and  $c = 21.4328 \text{ \AA}$  with angles  $\alpha = \beta = 90^\circ$  and  $\gamma = 120^\circ$ , consists of four layers; the bottom two layers were fixed while the others were allowed to relax during optimizations. The slab models were constructed using the standard crystallographic information file for the Zn primitive cell, ensuring a minimum vacuum thickness of  $15 \text{ \AA}$  to prevent interactions between slabs. For all energy minimizations, a k-point grid of  $3 \times 3 \times 1$  was employed. The convergence criteria for the geometry optimizations were set such that the Hellmann-Feynman forces on any atom should not exceed  $0.03 \text{ eV \AA}^{-1}$ , and the total energy difference and the inter-ionic displacement should be less than  $1 \times 10^{-5} \text{ eV/atom}$  and  $0.001 \text{ \AA/atom}$ , respectively. The adsorption energy ( $\Delta E_{\text{ads}}$ ) was calculated as follows:

$$\Delta E_{\text{ads}} = E_{*_{\text{ads}}} - E_{\text{ads}}$$

where  $E_{*_{\text{ads}}}$  is the total energy of the slab model and the ion, and  $E_{\text{ads}}$  is the energy of the isolated Zn atom.

**Finite element method simulations:** The distribution of electrolyte potential and current density during Zn electrodeposition was investigated using COMSOL Multiphysics software, which utilizes the finite element method. For this analysis, the Zn array on the surface of the Zn electrode was modeled as semi-elliptical cones. The boundary conditions applied to the electrodes were governed by the Butler-Volmer equation.<sup>12</sup> The voltage difference across the electrodes was established at  $0.1 \text{ V}$  (vs. Zn/Zn<sup>2+</sup>), with an initial Zn<sup>2+</sup> ions concentration set at  $2 \text{ M}$ . The diffusion coefficient of Zn<sup>2+</sup> ions within the electrolyte was set to  $1 \times 10^{-9} \text{ m}^2 \text{ s}^{-1}$ . The average current density across the cell was set as  $25 \text{ A m}^{-2}$ .

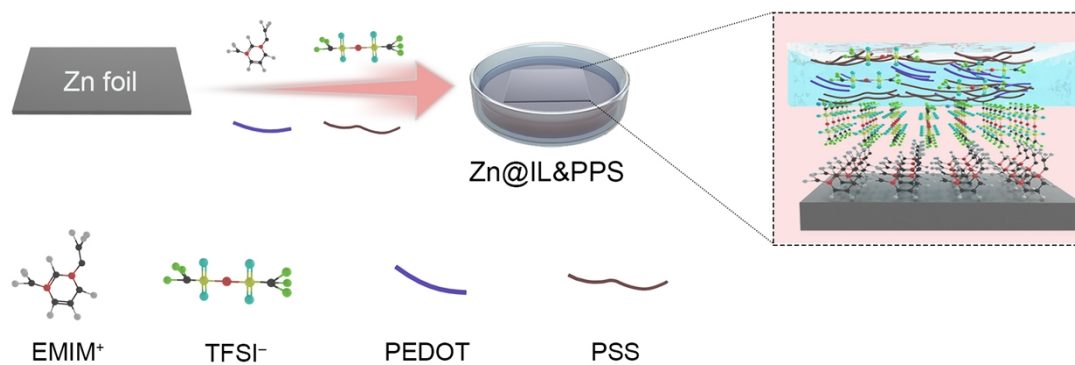

**Fig. S1** Schematic diagram of the synthesis of Zn@IL&PPS.

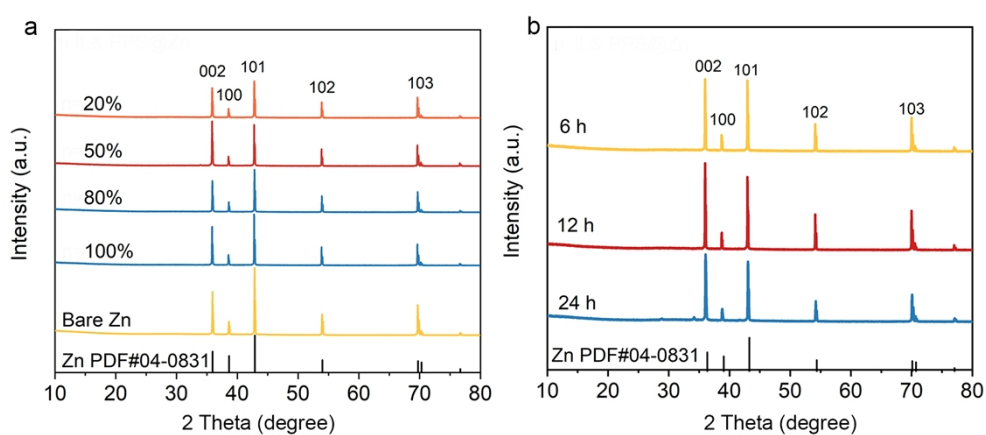

**Fig. S2** (a) XRD patterns of the Zn foils treated by IL and PEDOT:PSS at varying volume ratios. (b) XRD patterns of the Zn foils treated by 1:1 of IL and PEDOT:PSS at different times.

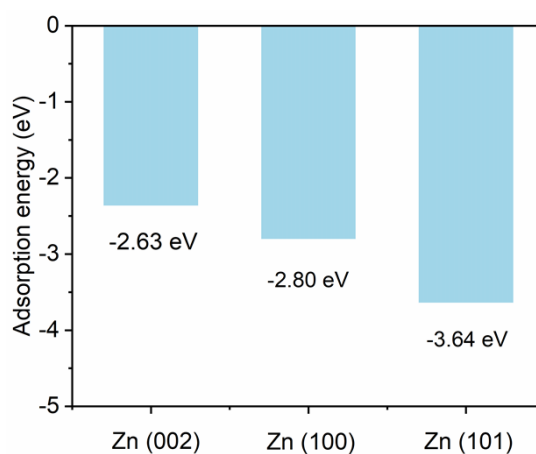

**Fig. S3** DFT calculated adsorption energy of EMIM<sup>+</sup> on different facets of Zn.

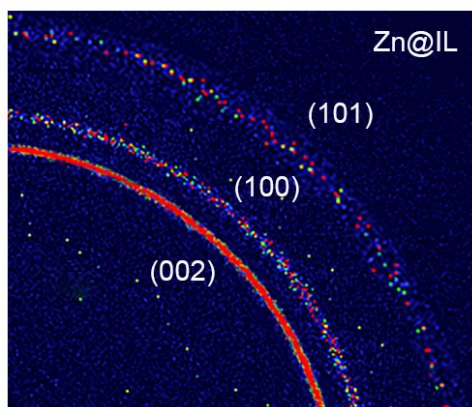

**Fig. S4** 2D WAXS patterns of Zn@IL.

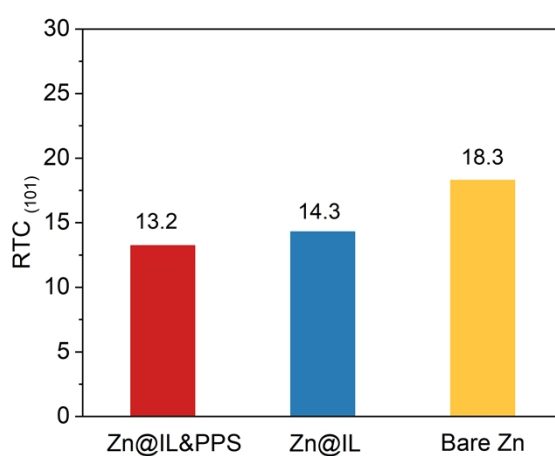

**Fig. S5** RTC<sub>(101)</sub> of the bare Zn, Zn@IL and Zn@IL&PPS.

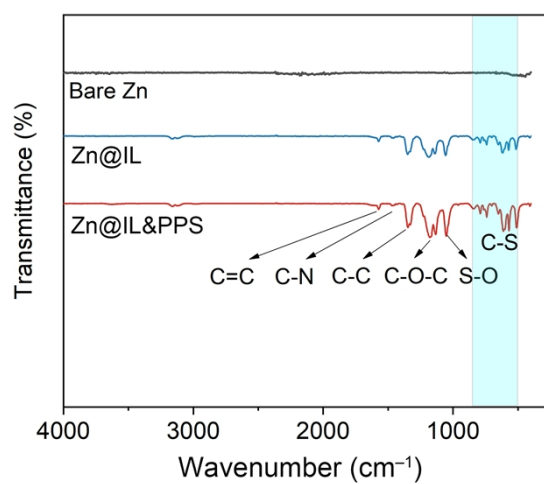

**Fig. S6** FTIR spectra of the bare Zn, Zn@IL, and Zn@IL&PPS.

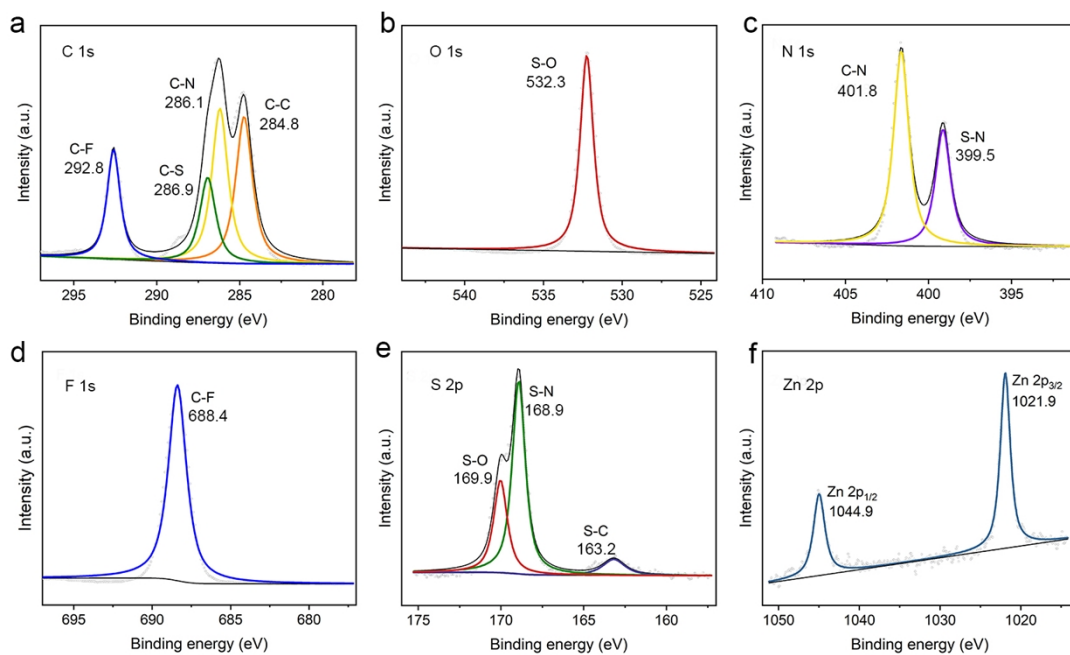

**Fig. S7** The C 1s, O 1s, N 1s, F 1s, S 2p, Zn 2p XPS spectra of Zn@IL.

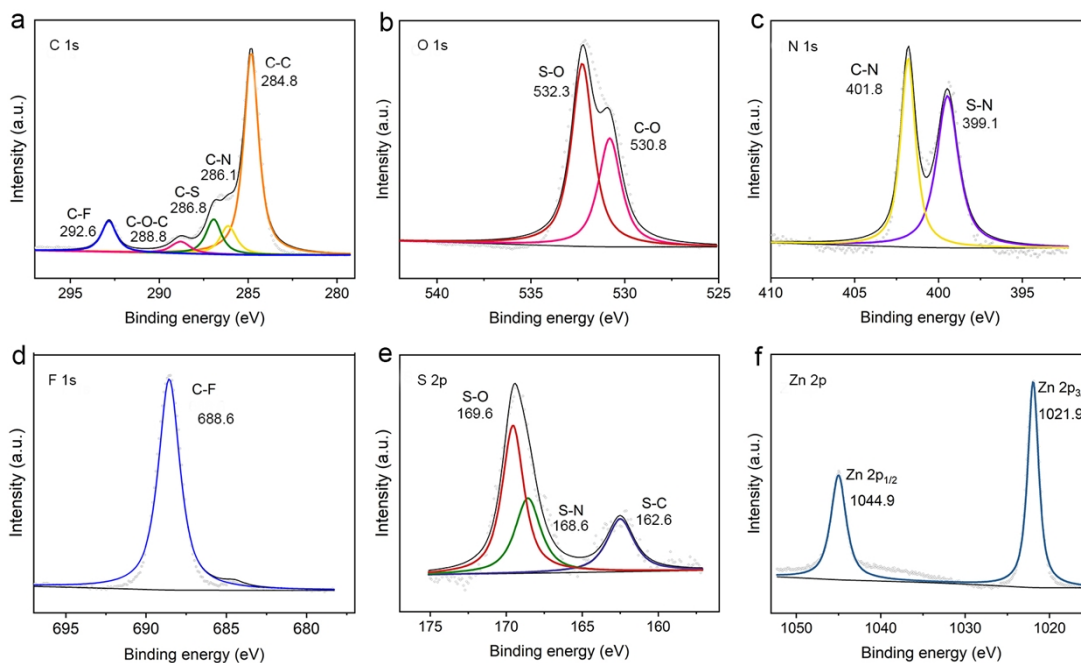

**Fig. S8** The C 1s, O 1s, N 1s, F 1s, S 2p, Zn 2p XPS spectra of Zn@IL&PPS.

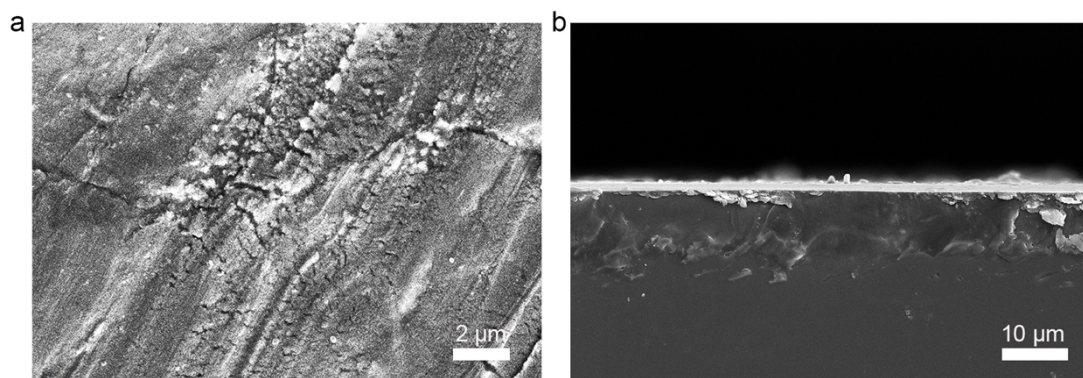

**Fig. S9** (a) Top-view and (b) cross-sectional SEM images of bare Zn.

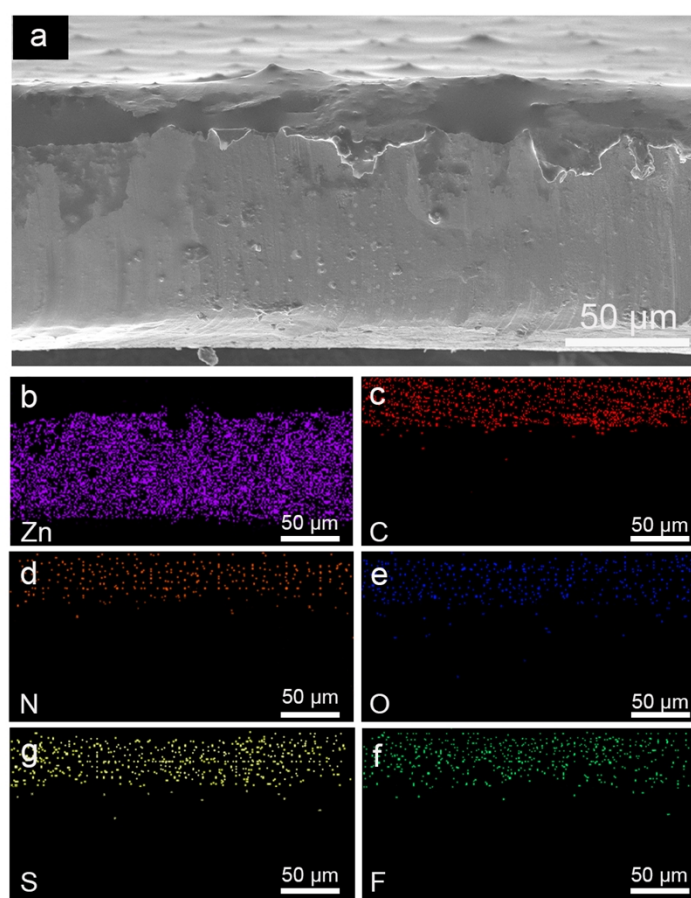

**Fig. S10** SEM and the corresponding EDS mapping images of Zn@IL&PPS.



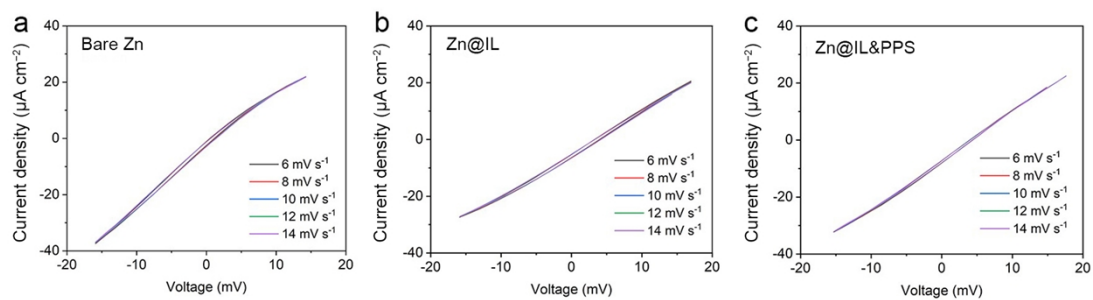

**Fig. S11** CV curves of the Zn symmetric cells.

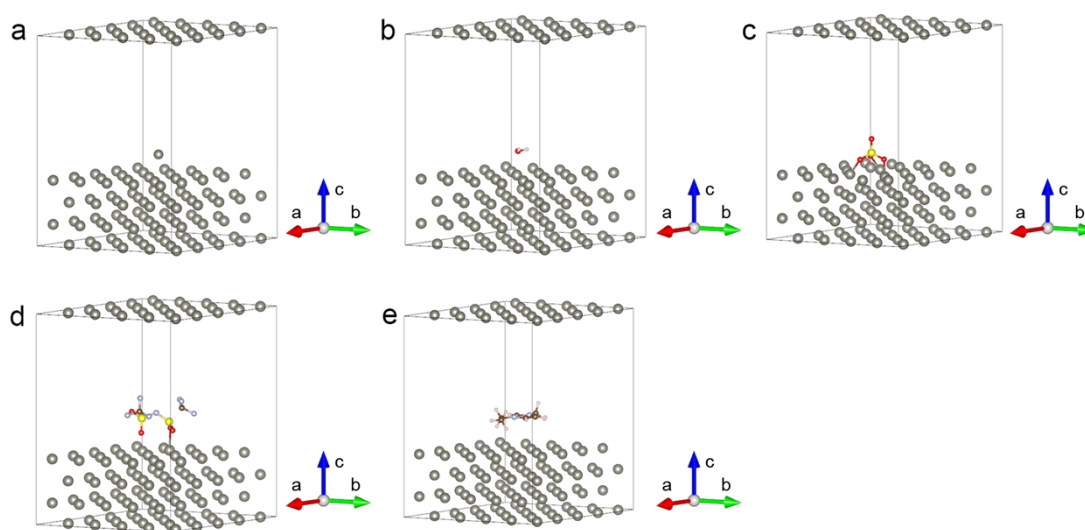

**Fig. S12** Different adsorption models between (a) Zn, (b) H<sub>2</sub>O, (c) SO<sub>4</sub><sup>2-</sup>, (d) TFSI<sup>-</sup>, (e) EMIM<sup>+</sup> and Zn (002) plane.

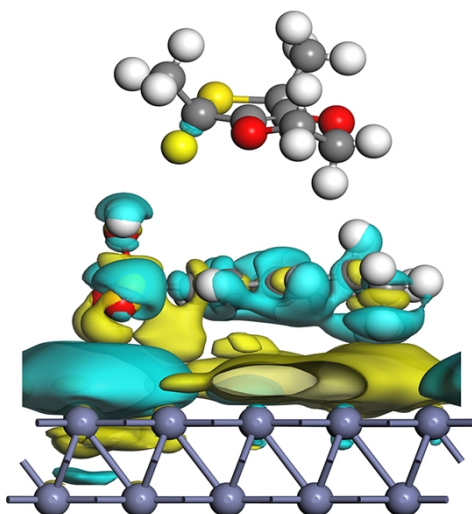

**Fig. S13** Top view of the CDD of EMIM<sup>+</sup> on Zn (002) plane.

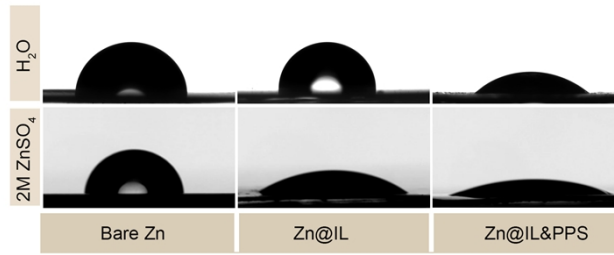

**Fig. S14** Optical images showing the contact angles of various Zn foils.

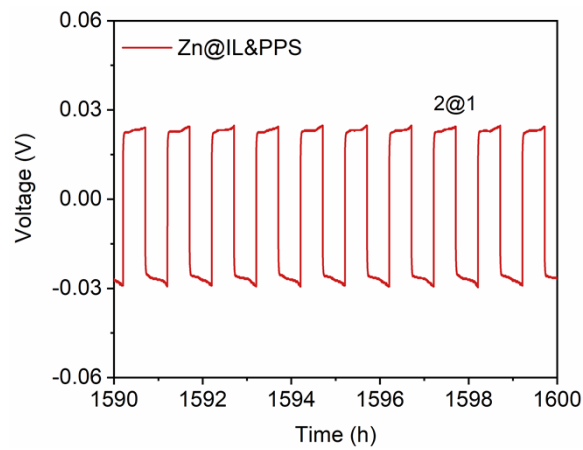

**Fig. S15** The enlarged voltage curves of Zn@IL&PPS electrode at 2@1.

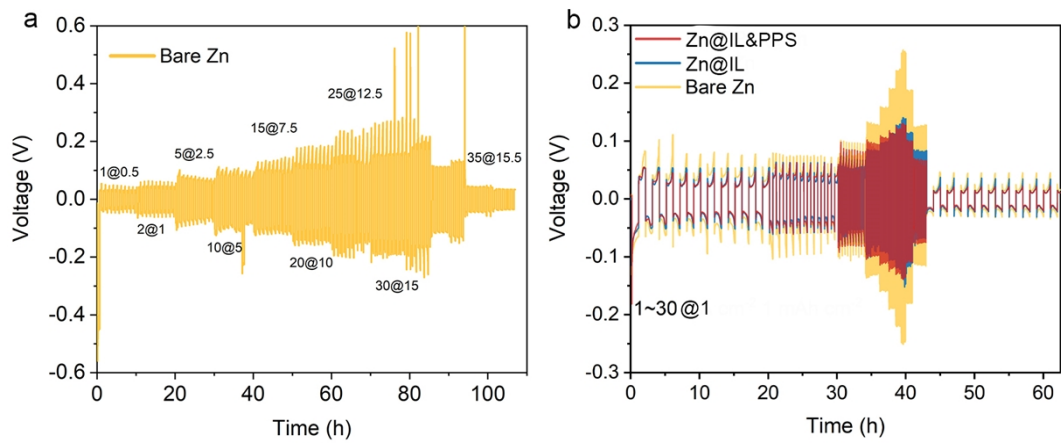

**Fig. S16** Rate testing of (a) bare Zn symmetric cell and (b) different Zn electrodes.

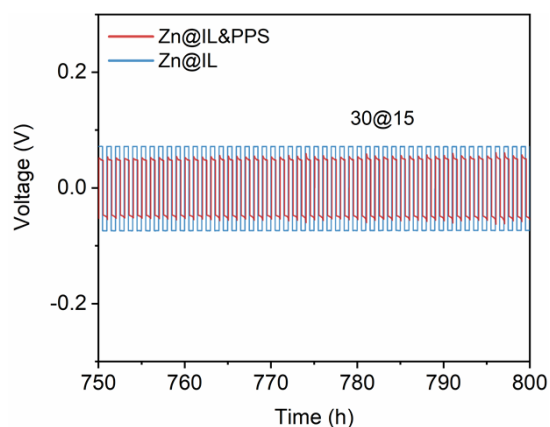

**Fig. S17** The enlarged voltage curves of different electrodes at 30@15.

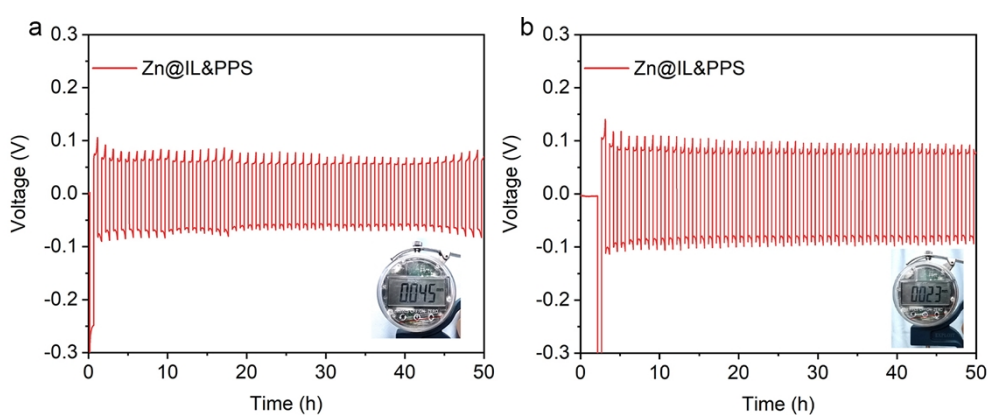

**Fig. S18** Galvanostatic cycling performance of the Zn@IL&PPS symmetrical batteries with electrode thickness of (a) 45 and (b) 23  $\mu\text{m}$  depth of discharge of about 25%.

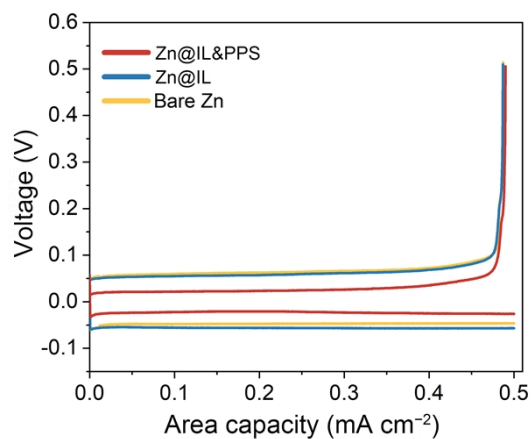

**Fig. S19** Voltage profiles of the Zn||Cu asymmetric cells at 1@0.5.

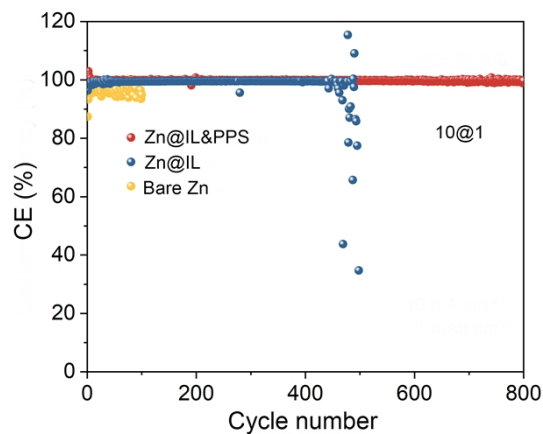

**Fig. S20** CE of the Zn||Cu asymmetric cells at 10@1.

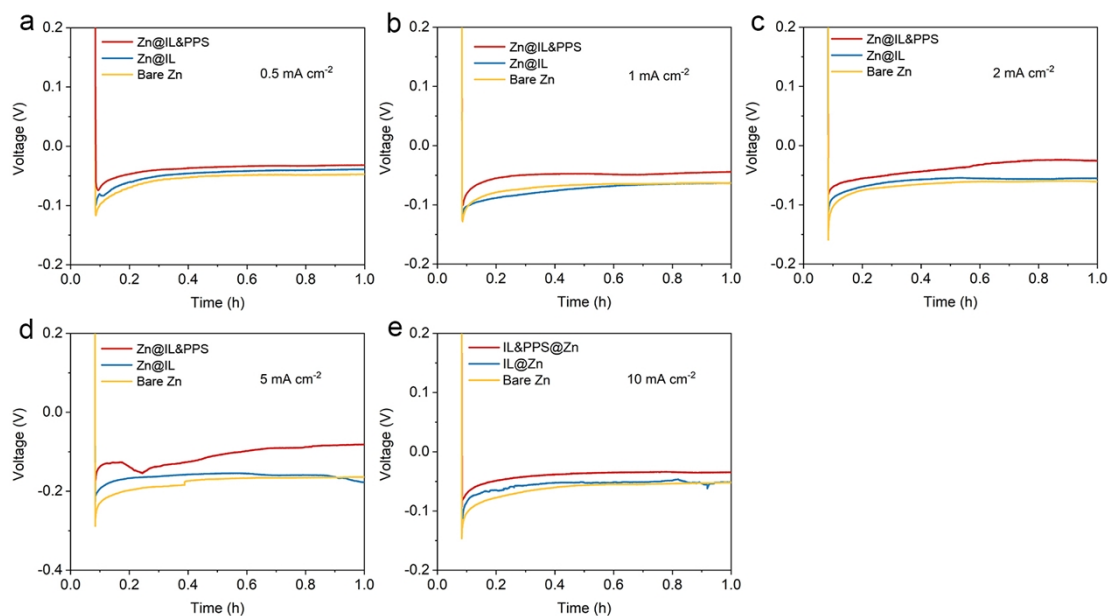

**Fig. S21** Nucleation overpotential of Zn||Cu asymmetric cells at different current densities.

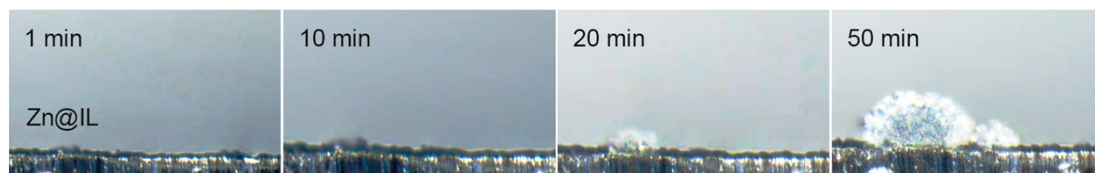

**Fig. S22** In situ optical microscopy images of Zn deposition on Zn@IL.

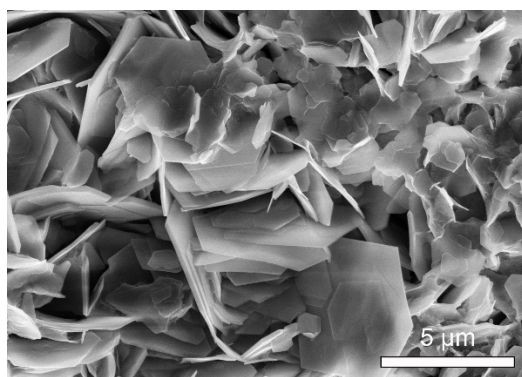

**Fig. S23** SEM image of the cycled Zn@IL.

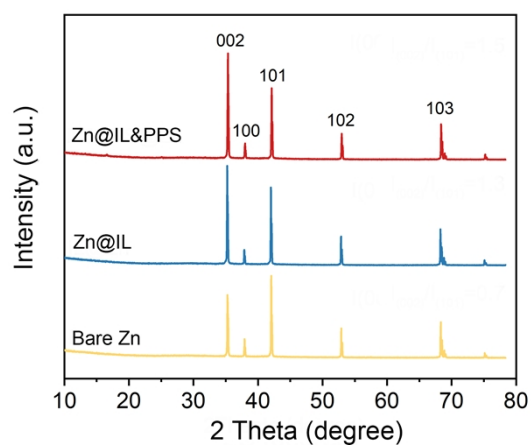

**Fig. S24** XRD patterns of the cycled Zn electrodes.

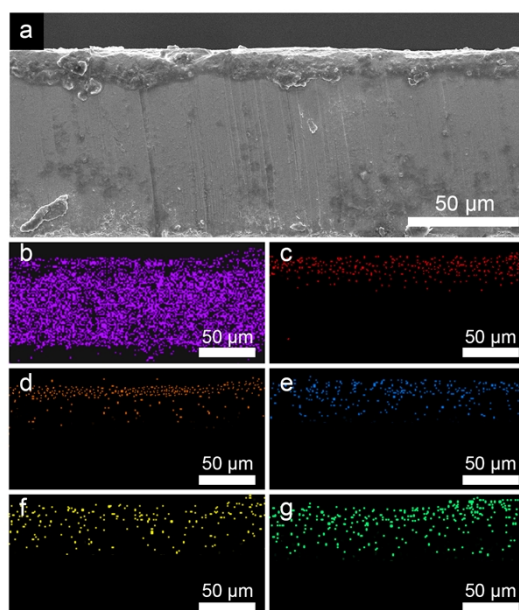

**Fig. S25** SEM and the corresponding EDS mapping images of the cycled Zn@IL&PPS.

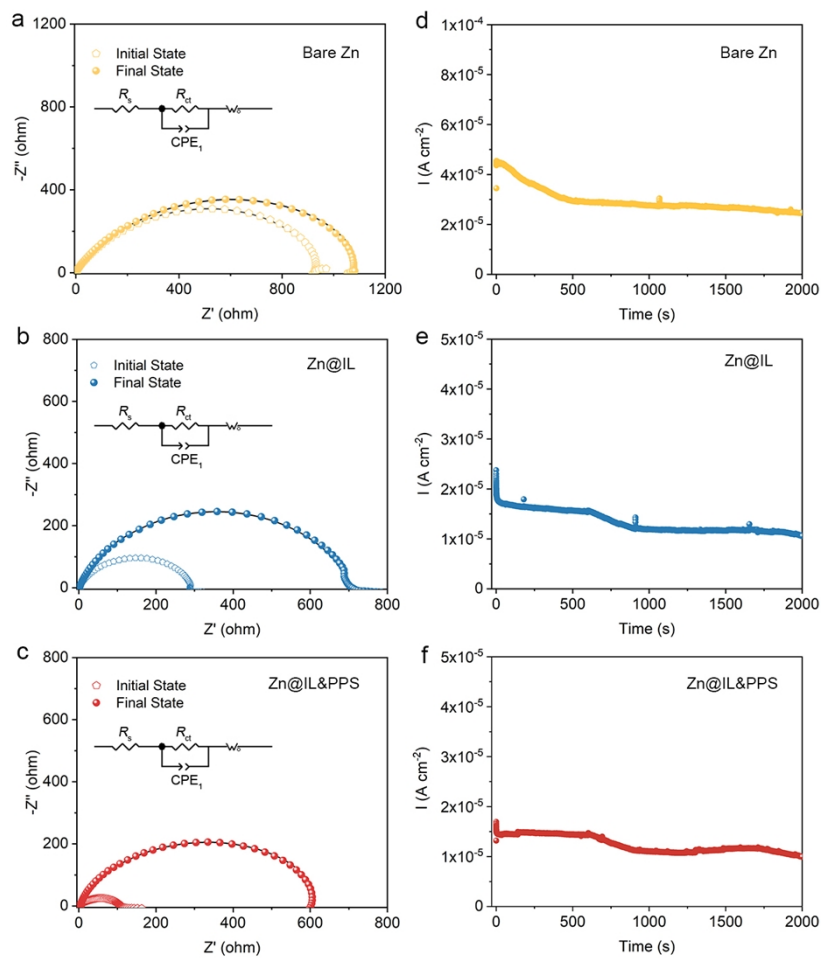

**Fig. S26** Nyquist plots of (a) bare Zn, (b) Zn@IL, and (c) Zn@IL&PPS electrodes before and after CA measurement. Inset: the equivalent circuit model of EIS. The CA curves of (d) bare Zn, (e) Zn@IL, and (f) Zn@IL&PPS electrodes.

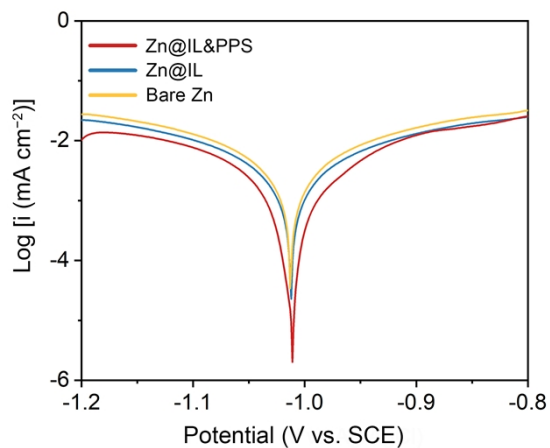

**Fig. S27** Tafel plots of different Zn electrodes.

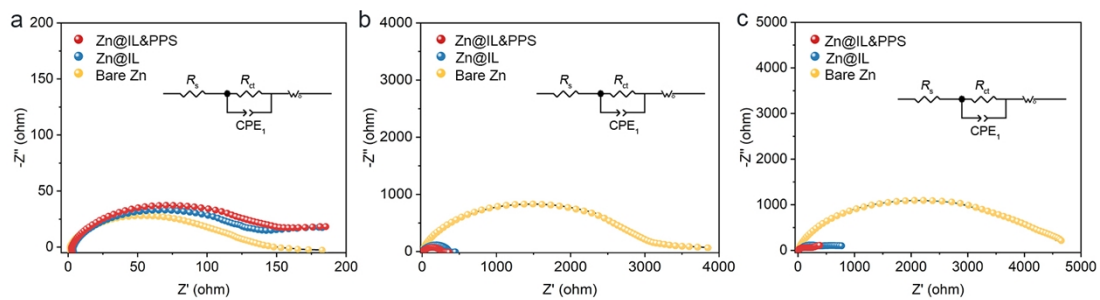

**Fig. S28** Nyquist plots of Zn electrodes (a) before, and after soaking in  $ZnSO_4$  electrolytes for (b) 12 and (c) 24 h. Inset: the equivalent circuit model of EIS.

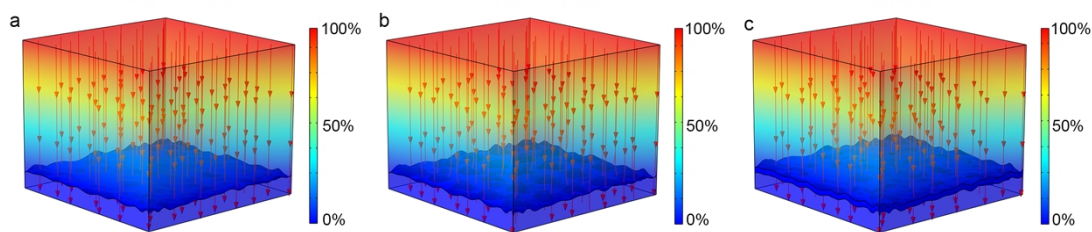

**Fig. S29** Simulations of the surface potential of (a) bare Zn, (b) Zn@IL, and (c) Zn@IL&PPS.

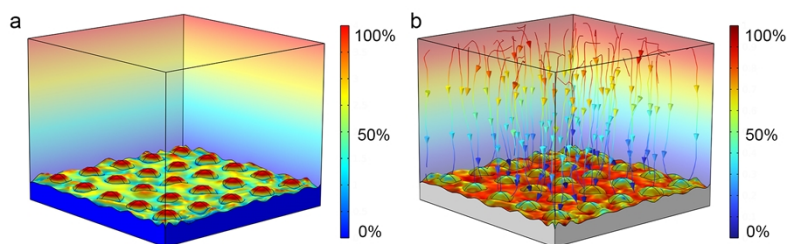

**Fig. S30** Simulations of the (a) electric field and (b)  $Zn^{2+}$  concentration field distribution on the surface of Zn@IL.

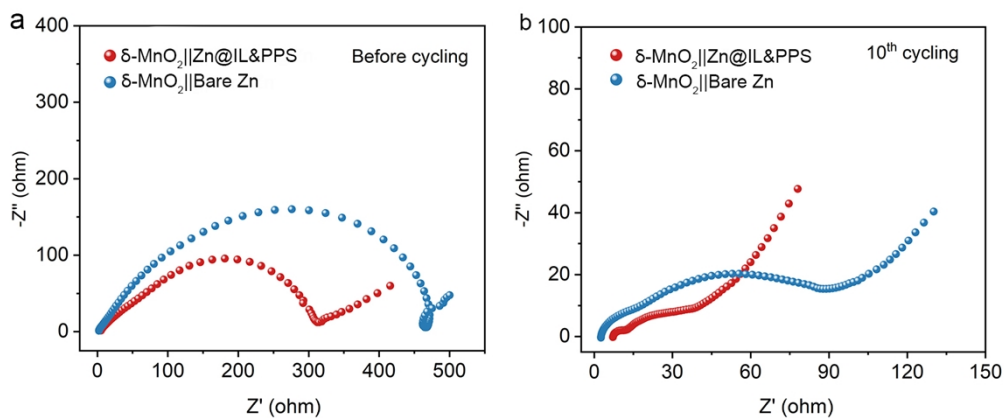

**Fig. S31** Nyquist plots of the  $\delta\text{-MnO}_2\|\text{Zn}$  and  $\delta\text{-MnO}_2\|\text{Zn@IL\&PPS}$  batteries (a) before and (b) after 10 cycles.

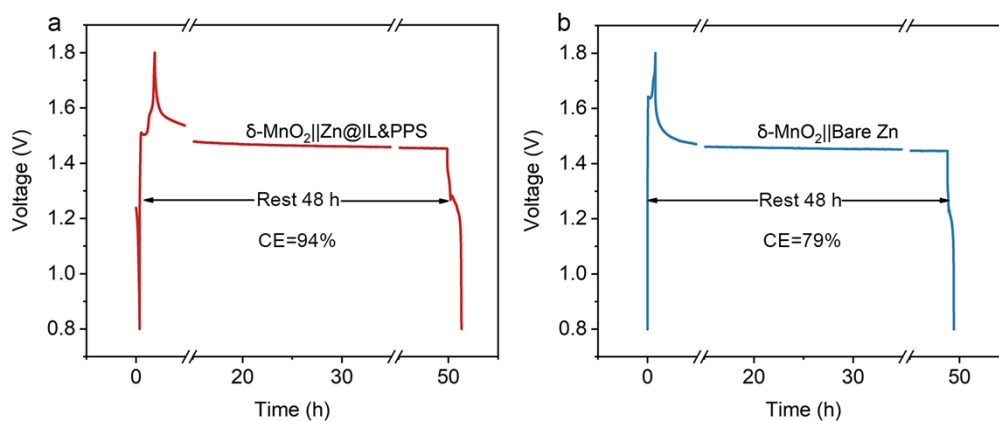

**Fig. S32** Self-discharge testing of the  $\delta\text{-MnO}_2\|\text{Zn@IL\&PPS}$  and  $\delta\text{-MnO}_2\|\text{bare Zn}$  batteries.

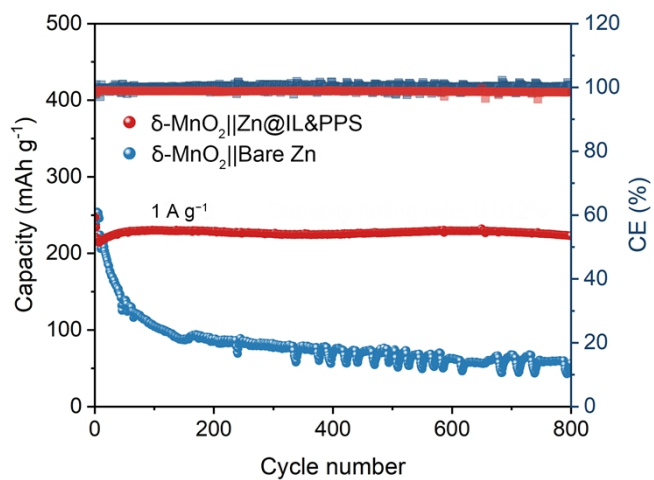

**Fig. S33** Cycling performance of the coin cells at  $1\text{ A g}^{-1}$ .



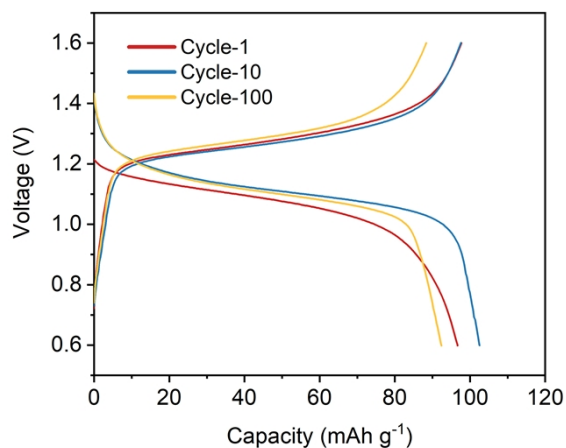

**Fig. S34** Charge/discharge curves of the  $I_2||Zn@IL&PPS$  pouch cell.

**Table S1.** The atomic ratio of  $Zn@IL&PPS$  and  $Zn@IL$ .

| Sample      | C     | F     | N    | O     | S    | Zn   |
|-------------|-------|-------|------|-------|------|------|
| $Zn@IL&PPS$ | 47.88 | 15.53 | 7.67 | 22.52 | 5.89 | 0.51 |
| $Zn@IL$     | 38.01 | 26.85 | 11.4 | 11.92 | 7.3  | 4.52 |

**Table S2.** Summary of the contact angles of bare Zn,  $Zn@IL$ , and  $Zn@IL&PPS$ .

| Samples     | $H_2O$ | 2 M $ZnSO_4$ |
|-------------|--------|--------------|
| Bare Zn     | 83.9   | 80.3         |
| $Zn@IL$     | 87.3   | 37.9         |
| $Zn@IL&PPS$ | 43.7   | 21.2         |

**Table S3.** Comparison of the electrochemical performance of Zn||Zn symmetric cells.

| Modifications         | Current density (mA cm <sup>-2</sup> ) | Capacity (mAh cm <sup>-2</sup> ) | Cycling (h) | Ref                                     |
|-----------------------|----------------------------------------|----------------------------------|-------------|-----------------------------------------|
| HP-Zn                 | 2                                      | 1                                | 1400        | Adv. Energy Mater. 2023, 13, 2300932    |
| TFA-AN@Zn             | 4                                      | 2                                | 1000        | Adv. Energy Mater. 2022, 12, 2102797    |
| Zn(TCNQ) <sub>2</sub> | 5                                      | 5                                | 220         | ACS Energy Lett. 2023, 8, 2718          |
| COP/Cu@Zn             | 4                                      | 4                                | 500         | Adv. Funct. Mater. 2023, 33, 2302293    |
| NGO@Zn                | 5                                      | 5                                | 300         | Adv. Mater. 2021, 33, 2101649           |
| Etched Zn             | 20                                     | 10                               | 400         | Energy Environ. Sci. 2024, 17, 642      |
| Zn(002)@ZPO           | 20                                     | 10                               | 500         | ACS Nano 2023, 17, 15113                |
| PM@Zn                 | 20                                     | 1                                | 400         | Angew. Chem. Int. Ed. 2023, 62, 2304454 |
| Zn@ZnF <sub>2</sub>   | 1                                      | 1                                | 800         | Adv. Mater. 2021, 33, 2007388           |
| Modified Zn           | 10                                     | 10                               | 500         | Energy Environ. Sci. 2023, 16, 275      |
| <b>Zn@IL&amp;PPS</b>  | <b>2</b>                               | <b>1</b>                         | <b>1600</b> | <b>This work</b>                        |
|                       | <b>30</b>                              | <b>15</b>                        | <b>800</b>  |                                         |

**Table S4.** Comparison of the electrochemical performance of I<sub>2</sub>||Zn batteries.

| Sample                     | Mass loading (mg cm <sup>-2</sup> ) | Capacity (mAh cm <sup>-2</sup> ) | Energy density (Wh kg <sup>-1</sup> ) | Current density (mA cm <sup>-2</sup> ) | Electrolyte                                                | Ref              |
|----------------------------|-------------------------------------|----------------------------------|---------------------------------------|----------------------------------------|------------------------------------------------------------|------------------|
| Zn@PFPA                    | 9                                   | 1.17                             | 143                                   | 18                                     | 2 M ZnSO <sub>4</sub>                                      | 13               |
| Zn-BTC                     | 2                                   | 0.2                              | 110                                   | 3.8                                    | 0.5 M ZnSO <sub>4</sub> , 1 M LiI and 0.1 M I <sub>2</sub> | 14               |
| SC-PPS@Zn                  | 2                                   | 0.17                             | 102                                   | 6.4                                    | 2 M ZnSO <sub>4</sub>                                      | 15               |
| Starch/I <sub>2</sub> /Zn  | 3                                   | 0.27                             | 75                                    | 6                                      | 0.5 M ZnSO <sub>4</sub> , 1 M LiI and 0.1 M I <sub>2</sub> | 16               |
| PDMS/TiO <sub>2-x</sub>    | 1.5                                 | 1                                | 192                                   | 1                                      | 1 M or 3 M ZnSO <sub>4</sub>                               | 17               |
| Pyridine-ZnSO <sub>4</sub> | 3.2                                 | 0.57                             | 198                                   | 0.6                                    | pyridine-ZnSO <sub>4</sub>                                 | 18               |
| PVDF-Sn@Zn                 | 0.8                                 | 5                                | 240                                   | 5                                      | 2 M ZnSO <sub>4</sub>                                      | 19               |
| B-Fe-NC/I <sub>2</sub>     | 3.5                                 | 0.16                             | 225                                   | 0.7                                    | 2 M ZnSO <sub>4</sub>                                      | 20               |
| BR-Zn                      | 20                                  | 1.1                              | 55                                    | 10                                     | 2 M ZnSO <sub>4</sub>                                      | 21               |
| <b>Zn@IL&amp;PPS</b>       | <b>37.5</b>                         | <b>6.25</b>                      | <b>239</b>                            | <b>7.5</b>                             | <b>1 M ZnSO<sub>4</sub> and 0.1 M KI</b>                   | <b>This work</b> |

## References

- [1] C. Prehal, H. Fitzek, G. Kothleitner, V. Presser, B. Gollas, S. A. Freunberger and Q. Abbas, *Nat. Commun.*, 2020, **11**, 4838.
- [2] X. Jin, L. Song, C. Dai, Y. Xiao, Y. Han, X. Li, Y. Wang, J. Zhang, Y. Zhao, Z. Zhang, N. Chen, L. Jiang and L. Qu, *Adv. Mater.*, 2022, **34**, 2109450.
- [3] M. Zhou, S. Guo, J. Li, X. Luo, Z. Liu, T. Zhang, X. Cao, M. Long, B. Lu, A. Pan, G. Fang, J. Zhou and S. Liang, *Adv. Mater.*, 2021, **33**, 2100187.
- [4] Q. Zhao, T. Xu, K. Liu, H. Du, M. Zhang, Y. Wang, L. Yang, H. Zhang, X. Wang and C. Si, *Energy Storage Mater.*, 2024, **71**, 103605.
- [5] L. Suo, Y.-S. Hu, H. Li, M. Armand and L. Chen, *Nat. Commun.*, 2013, **4**, 1481.
- [6] Z. Zhao, J. Zhao, Z. Hu, J. Li, J. Li, Y. Zhang, C. Wang and G. Cui, *Energy Environ. Sci.*, 2019, **12**, 1938-1949.
- [7] S. J. Clark, M. D. Segall, C. J. Pickard, P. J. Hasnip, M. I. J. Probert, K. Refson, M. C. Payne, *Z. Kristallogr.*, 2005, **220**, 567-570.
- [8] P. J. Hasnip, C. J. Pickard, *Comput. Phys. Commun.*, 2006, **174**, 24-29.
- [9] J. P. Perdew, K. Burke, M. Ernzerhof, *Phys. Rev. Lett.*, 1996, **77**, 3865.
- [10] J. P. Perdew, J. A. Chevary, S. H. Vosko, K. A. Jackson, M. R. Pederson, D. J. Singh, C. Fiolhais, *Phys. Rev. B*, 1992, **46**, 6671.
- [11] J. D. Head, M. C. Zerner, *Chem. Phys. Lett.*, 1985, **122**, 264-270.
- [12] P. Wang, S. Liang, C. Chen, X. Xie, J. Chen, Z. Liu, Y. Tang, B. Lu, J. Zhou, *Adv. Mater.*, 2022, **34**, 2202733.
- [13] S. Huang, R. Tang, X. Liu, Y. Zhang, Y. Tang, Z. Wen, M. Ye, Y. Yang, C. C. Li, *Energy Environ. Sci.*, 2024, **17**, 591-601.
- [14] H. Yang, Y. Qiao, Z. Chang, H. Deng, P. He, H. Zhou, *Adv. Mater.*, 2020, **32**, 2004240.
- [15] L. Zhang, J. Huang, H. Guo, L. Ge, Z. Tian, M. Zhang, J. Wang, G. He, T. Liu, J. Hofkens, D. J. L. Brett, F. Lai, *Adv. Energy Mater.*, 2023, **13**, 2203790.
- [16] S.-J. Zhang, J. Hao, H. Li, P.-F. Zhang, Z.-W. Yin, Y.-Y. Li, B. Zhang, Z. Lin, S.-Z. Qiao, *Adv. Mater.*, 2022, **34**, 2201716.
- [17] Z. Guo, L. Fan, C. Zhao, A. Chen, N. Liu, Y. Zhang, N. Zhang, *Adv. Mater.*, 2022,

**34**, 2105133.

[18] Y. Lyu, J. A. Yuwono, P. Wang, Y. Wang, F. Yang, S. Liu, S. Zhang, B. Wang, K. Davey, J. Mao, Z. Guo, *Angew. Chem. Int. Ed.*, 2023, **62**, 202303011.

[19] Q. Cao, Y. Gao, J. Pu, X. Zhao, Y. Wang, J. Chen, C. Guan, *Nat. Commun.*, 2023, **14**, 641.

[20] M. Liu, Q. Chen, X. Cao, D. Tan, J. Ma, J. Zhang, *J. Am. Chem. Soc.*, 2022, **144**, 21683.

[21] Z. Yang, C. Hu, Q. Zhang, T. Wu, C. Xie, H. Wang, Y. Tang, X. Ji, H. Wang, *Angew. Chem. Int. Ed.*, 2023, **62**, 202308017.
